# Supplementary material
Source: PubMed Central journal article supplement (PMC151369)
Supplement: pnas_0130099100_1.pdf [file pnas_0130099100_1.pdf]

Table 1. Sequences and species used in the study.

| Species and strain                                                  | Designation of sequence in the respective figure | Length, nt | GenBank accession number |
|---------------------------------------------------------------------|--------------------------------------------------|------------|--------------------------|
| <b>16S rRNA</b>                                                     |                                                  |            |                          |
| <b>Archaea</b>                                                      |                                                  |            |                          |
| <i>Aeropyrum pernix</i>                                             | Aeropyrum                                        | 1500       | NC_000854                |
| <i>Archaeoglobus fulgidus</i>                                       | Archaeoglobus                                    | 1492       | NC_000917                |
| <i>Halobacterium</i> sp. NRC-1                                      | Halobacterium                                    | 1473       | NC_002607                |
| <i>Methanobacterium thermoautotrophicum</i> deltaH                  | Methanobacterium                                 | 1479       | NC_000916                |
| <i>Methanococcus jannaschii</i>                                     | Methanococcus                                    | 1475       | NC_000909                |
| <i>Pyrobaculum aerophilum</i>                                       | Pyrobaculum                                      | 2211       | NC_003364                |
| <i>Pyrococcus horikoshii</i>                                        | Pyrococcus                                       | 1495       | NC_000961                |
| <i>Sulfolobus solfataricus</i> P2                                   | Sulfolobus                                       | 1496       | NC_002754                |
| <b>Chloroflexi (green non-sulfur bacteria)</b>                      |                                                  |            |                          |
| <i>Chloroflexus aurantiacus</i>                                     | Chloroflexus                                     | 1401       | D38365                   |
| <b>Proteobacteria (purple bacteria and relatives)</b>               |                                                  |            |                          |
| <i>Agrobacterium tumefaciens</i> strain C58                         | Agrobacterium                                    | 1492       | AE009201                 |
| <i>Burkholderia</i> sp. LMG 16307                                   | Burkholderia                                     | 1472       | AF215706                 |
| <i>Mesorhizobium loti</i> strain LMG 17826t2                        | Mesorhizobium                                    | 1426       | AJ315352                 |
| <i>Pseudomonas fluorescens</i>                                      | Pseudomonas                                      | 1527       | D84013                   |
| <i>Rhodobacter sphaeroides</i> strain CGA009                        | Rhodobacter                                      | 1388       | D16424                   |
| <i>Rhodopseudomonas palustris</i>                                   | Rhodopseudomonas                                 | 1429       | AY084079                 |
| <i>Rhodospirillum rubrum</i>                                        | Rhodospirillum                                   | 1406       | D30778                   |
| <i>Sinorhizobium meliloti</i>                                       | Sinorhizobium                                    | 1484       | 15963753                 |
| <i>Xanthomonas campestris</i> pv. <i>campestris</i> str. ATCC 33913 | Xanthomonas                                      | 1547       | NC_003902                |
| <b>Thermotogae</b>                                                  |                                                  |            |                          |
| <i>Thermotoga maritima</i>                                          | Thermotoga                                       | 1559       | NC_000853                |
| <b>Cyanobacteria (blue-green algae)</b>                             |                                                  |            |                          |
| <i>Anabaena</i> sp. PCC7120                                         | Anabaena                                         | 1489       | 17131110                 |
| <i>Calothrix parietina</i>                                          | Calothrix                                        | 1110       | AF334696                 |
| <i>Chlorogloeopsis</i> sp.                                          | Chlorogloeopsis                                  | 1461       | X68780                   |
| <i>Chroococciopsis thermalis</i>                                    | Chroococciopsis                                  | 1443       | AB039005                 |
| <i>Cyanothece</i> sp. PCC8801                                       | Cyanothece                                       | 1446       | AF296873                 |
| <i>Cylindrospermum</i> sp. PCC7417                                  | Cylindrospermum                                  | 1444       | AJ133163                 |
| <i>Geitlerinema</i> sp. PCC7105                                     | Geitlerinema                                     | 1435       | AB039010                 |
| <i>Gloeobacter violaceus</i>                                        | Gloeobacter                                      | 1407       | AF132790                 |
| <i>Nodularia spumigena</i> PCC73104                                 | Nodularia                                        | 1517       | AF268023                 |

|                                                                |                                         |                   |           |
|----------------------------------------------------------------|-----------------------------------------|-------------------|-----------|
| <i>Nostoc punctiforme</i> PCC73102                             | Nostoc                                  | 1410              | AF027655  |
| <i>Prochlorococcus marinus</i> MED4                            | Prochlorococcus                         | 1147              | AF001466  |
| <i>Scytonema hyalinum</i>                                      | Scytonema                               | 1111              | AF334700  |
| <i>Synechococcus</i> sp. PCC7942                               | Synechococcus                           | 1411              | AF132930  |
| <i>Synechocystis</i> sp. PCC6803                               | Synechocystis                           | 1489              | 1653715   |
| <i>Thermosynechococcus elongatus</i>                           | Elongatus                               | 1491              | AP005376  |
| <i>Xenococcus</i> sp. PCC7305                                  | Xenococcus                              | 1408              | AF132783  |
| <b>kaiC</b>                                                    |                                         |                   |           |
| <b>Archaea</b>                                                 |                                         |                   |           |
| <i>Aeropyrum pernix</i>                                        | Aeropyrum                               | 756               | NC_000854 |
| <i>Archaeoglobus fulgidus</i>                                  | Archaeoglobus 1<br>Archaeoglobus 2      | 1332<br>681       | NC_000917 |
| <i>Halobacterium</i> sp. NRC-1                                 | Halobacterium                           | 657               | NC_002607 |
| <i>Methanobacterium thermoautotrophicum</i> deltaH             | <i>Methanobacterium</i>                 | 1413              | NC_000916 |
| <i>Methanococcus jannaschii</i>                                | Methanococcus                           | 729               | NC_000909 |
| <i>Pyrobaculum aerophilum</i>                                  | Pyrobaculum 1<br>Pyrobaculum 2          | 846<br>846        | NC_003364 |
| <i>Pyrococcus horikoshii</i>                                   | Pyrococcus                              | 1452              | NC_000961 |
| <i>Sulfolobus solfataricus</i> P2                              | Sulfolobus 1<br>Sulfolobus 2            | 843<br>789        | NC_002754 |
| <b>Chloroflexi (green non-sulfur bacteria)</b>                 |                                         |                   |           |
| <i>Chloroflexus aurantiacus</i>                                | <i>Chloroflexus</i> 1<br>Chloroflexus 2 | 1536<br>1449      | JGI*      |
| <b>Proteobacteria (purple bacteria and relatives)</b>          |                                         |                   |           |
| <i>Agrobacterium tumefaciens</i> C58 plasmid AT                | Agrobacterium 1<br>Agrobacterium 2      | 1515<br>1509      | NC_003064 |
| <i>Burkholderia fungorum</i>                                   | Burkholderia                            | 1518              | NC_003371 |
| <i>Mesorhizobium loti</i> plasmid pMLb                         | Mesorhizobium 1                         | 1530              | NC_002682 |
| <i>Mesorhizobium loti</i>                                      | Mesorhizobium 2                         | 1488              | NC_002678 |
| <i>Pseudomonas fluorescens</i>                                 | Pseudomonas                             | 1518              | JGI       |
| <i>Rhodobacter sphaeroides</i> CGA009                          | <i>Rhodobacter</i>                      | 1713              | JGI       |
| <i>Rhodopseudomonas palustris</i> CGA009                       | <i>Rhodopseudomonas</i>                 | 1650 <sup>†</sup> | JGI       |
| <i>Rhodospirillum rubrum</i> ATCC 11170                        | <i>Rhodospirillum</i> 1                 | 1683              | JGI       |
| <i>Sinorhizobium meliloti</i> plasmid pSymA                    | Sinorhizobium                           | 1446              | NC_003037 |
| <i>Xanthomonas campestris</i> pv. <i>campestris</i> ATCC 33913 | Xanthomonas                             | 1542              | AE012267  |
| <b>Thermotogae</b>                                             |                                         |                   |           |
| <i>Thermotoga maritima</i>                                     | Thermotoga                              | 762               | NC_000853 |
| <b>Cyanobacteria (blue-green algae)</b>                        |                                         |                   |           |

|                                                       |                         |                  |           |
|-------------------------------------------------------|-------------------------|------------------|-----------|
| <i>Anabaena</i> sp. PCC7120                           | <i>Anabaena</i>         | 1560             | AP003591  |
| <i>Calothrix parietina</i>                            | <i>Calothrix</i>        | 594 <sup>†</sup> | AF239754  |
| <i>Chlorogloeopsis fritschii</i>                      | <i>Chlorogloeopsis</i>  | 594 <sup>†</sup> | AF222603  |
| <i>Chroococciopsis thermalis</i>                      | <i>Chroococciopsis</i>  | 594 <sup>†</sup> | AF239752  |
| <i>Cyanothece</i> sp. PCC 8801                        | <i>Cyanothece</i>       | 1566             | AF442204  |
| <i>Cylindrospermum</i> sp. PCC7417                    | <i>Cylindrospermum</i>  | 807 <sup>†</sup> | AF222605  |
| <i>Geitlerinema</i> sp. PCC7105                       | <i>Geitlerinema</i>     | 594 <sup>†</sup> | AF222604  |
| <i>Gloeobacter violaceus</i>                          | <i>Gloeobacter</i>      | 594 <sup>†</sup> | AF239755  |
| <i>Nodularia spumigena</i> PCC73104                   | <i>Nodularia</i>        | 807 <sup>†</sup> | AF222602  |
| <i>Nostoc punctiforme</i> ATCC 29133                  | <i>Nostoc</i>           | 1563             | JGI       |
| <i>Prochlorococcus marinus</i> MED4                   | <i>Prochlorococcus</i>  | 1530             | JGI       |
| <i>Scytonema</i> sp. PCC 7110                         | <i>Scytonema</i>        | 594 <sup>†</sup> | AF222600  |
| <i>Synechococcus</i> sp. PCC7942                      | <i>Synechococcus</i>    | 1560             | AB010691  |
| <i>Synechocystis</i> sp. PCC6803                      | <i>Synechocystis 1</i>  | 1560             | AB001339  |
|                                                       | <i>Synechocystis 2</i>  | 1518             | 16329170  |
|                                                       | <i>Synechocystis 3</i>  | 1707             | D90910    |
| <i>Thermosynechococcus elongatus</i>                  | <i>Elongatus</i>        | 1557             | AP005370  |
| <i>Xenococcus</i> sp. PCC7305                         | <i>Xenococcus</i>       | 594 <sup>†</sup> | AF222601  |
| <b>kaiB</b>                                           |                         |                  |           |
| <b>Archaea</b>                                        |                         |                  |           |
| <i>Methanobacterium thermoautotrophicum</i> deltaH    | <i>Methanobacterium</i> | 255              | NC_000916 |
| <b>Chloroflexi (green non-sulfur bacteria)</b>        |                         |                  |           |
| <i>Chloroflexus aurantiacus</i>                       | <i>Chloroflexus 1</i>   | 306              | JGI       |
|                                                       | <i>Chloroflexus 2</i>   | 282              |           |
| <b>Proteobacteria (purple bacteria and relatives)</b> |                         |                  |           |
| <i>Rhodobacter sphaeroides</i>                        | <i>Rhodobacter</i>      | 270              | JGI       |
| <i>Rhodopseudomonas palustris</i> CGA009              | <i>Rhodopseudomonas</i> | 273 <sup>†</sup> | JGI       |
| <i>Rhodospirillum rubrum</i>                          | <i>Rhodospirillum 1</i> | 291              | JGI       |
|                                                       | <i>Rhodospirillum 2</i> | 308              |           |
| <b>Cyanobacteria (blue-green algae)</b>               |                         |                  |           |
| <i>Anabaena</i> sp. PCC7120                           | <i>Anabaena 1</i>       | 327              | AP003591  |
|                                                       | <i>Anabaena 2</i>       | 765              |           |
| <i>Cyanothece</i> sp. PCC8801                         | <i>Cyanothece</i>       | 315              | AF442204  |
| <i>Nostoc punctiforme</i>                             | <i>Nostoc 1</i>         | 315              | JGI       |
|                                                       | <i>Nostoc 2</i>         | 858              |           |
| <i>Prochlorococcus marinus</i> MED4                   | <i>Prochlorococcus</i>  | 324              | JGI       |
| <i>Synechococcus</i> sp. PCC7942                      | <i>Synechococcus</i>    | 309              | AB010691  |
| <i>Synechocystis</i> sp. PCC6803                      | <i>Synechocystis 1</i>  | 318              | D90917    |
|                                                       | <i>Synechocystis 2</i>  | 309              | NC_000911 |
|                                                       | <i>Synechocystis 3</i>  | 327              | NC_000911 |

|                                      |                    |     |           |
|--------------------------------------|--------------------|-----|-----------|
| <i>Thermosynechococcus elongatus</i> | <i>Elongatus 1</i> | 327 | AP005370  |
|                                      | <i>Elongatus 2</i> | 804 | NC_004113 |
| <b>kaiA</b>                          |                    |     |           |
| <b>Cyanobacteria</b>                 |                    |     |           |
| <i>Anabaena</i> sp. PCC7120          |                    | 309 | AP003591  |
| <i>Nostoc punctiforme</i>            |                    | 567 | JGI       |
| <i>Synechococcus</i> sp. PCC7942     |                    | 855 | AB010691  |
| <i>Synechocystis</i> sp. PCC6803     |                    | 900 | 16329170  |
| <i>Thermosynechococcus elongatus</i> |                    | 852 | AP005370  |

\* JGI, sequence obtained from Joint Genome Institute database at [www.jgi.doe.gov/JGI\\_microbial/](http://www.jgi.doe.gov/JGI_microbial/).

† Partial sequence. The italics indicate *kai* sequences residing in the cluster (not shown in the figures).
